# Supplementary material for: Explaining interdecadal salinity changes in the Baltic Sea in a 1850–2008 hindcast simulation
Source: Copernicus journal article supplement (doi:10.5194/cp-2019-105), 2019-09-27
Supplement: Supplementary file 1 [file cp-2019-105-supplement.pdf]

# 1 Derivation of wavelet transformation normalisation factor

Consider a finite time series, expressed continuously as a function of time:

$$x = x(t) \quad | \quad t \in [0, T] \quad (1)$$

We define a Morlet wavelet as

$$\phi(a, t) = b \exp\left(-i\omega_0 \frac{t}{a}\right) \exp\left(-\frac{t^2}{2a^2}\right). \quad (2)$$

The choice of the normalisation parameter  $b$  depends on the application. Typically we want to normalise the individual wavelet and choose  $b = \pi^{-0.25}a^{-0.5}$ . In this case we get

$$\phi(a, t) = \pi^{-0.25}a^{-0.5} \exp\left(-i\omega_0 \frac{t}{a}\right) \exp\left(-\frac{t^2}{2a^2}\right), \quad (3)$$

$$\int_{t=-\infty}^{\infty} \phi(a, t)\phi^*(a, t) = \pi^{-0.5}a^{-1} \int_{t=-\infty}^{\infty} \exp\left(-\frac{t^2}{a^2}\right). \quad (4)$$

If we define  $\sigma = a/\sqrt{2}$  we can use the normalisation of the Gaussian curve:

$$\int_{t=-\infty}^{\infty} \frac{1}{\sigma\sqrt{2\pi}} \exp\left(-\frac{t^2}{2\sigma^2}\right) = 1 \quad (5)$$

$$\int_{t=-\infty}^{\infty} \exp\left(-\frac{t^2}{2\sigma^2}\right) = \sigma\sqrt{2\pi} \quad (6)$$

and obtain

$$\int_{t=-\infty}^{\infty} \phi(a, t) = \pi^{-0.5}a^{-1}\sigma\sqrt{2\pi} = 1. \quad (7)$$

Let's Fourier transform the wavelet. To do so, we Fourier-transform parts of the formula first:

$$\exp\left(-\frac{t^2}{2a^2}\right) = \int_{\omega=-\infty}^{\infty} \frac{d\omega}{2\pi} e^{-i\omega t} a\sqrt{2\pi} e^{-\frac{\omega^2 a^2}{2}}, \quad (8)$$

$$\exp\left(-i\frac{\omega_0}{a}t\right) = \int_{\omega=-\infty}^{\infty} \frac{d\omega}{2\pi} e^{-i\omega t} 2\pi\delta\left(\omega - \frac{\omega_0}{a}\right), \quad (9)$$

$$(10)$$

Since  $\phi(a, t)$  is a product, we can write  $\phi(a, \omega)$  as a convolution:

$$\phi(a, t) = \pi^{-0.25} a^{-0.5} \int_{\omega=-\infty}^{\infty} \frac{d\omega}{2\pi} e^{-i\omega t} \frac{1}{2\pi} \left( a\sqrt{2\pi} e^{\frac{-\omega^2 a^2}{2}} \right) * \left( 2\pi \delta\left(\omega - \frac{\omega_0}{a}\right) \right) \quad (11)$$

$$= \pi^{0.25} \sqrt{2a} \int_{\omega=-\infty}^{\infty} \frac{d\omega}{2\pi} e^{-i\omega t} \left( e^{\frac{-(a\omega)^2}{2}} \right) * \left( \delta\left(\omega - \frac{\omega_0}{a}\right) \right) \quad (12)$$

$$= \pi^{0.25} \sqrt{2a} \int_{\omega=-\infty}^{\infty} \frac{d\omega}{2\pi} e^{-i\omega t} e^{\frac{-(a\omega - \omega_0)^2}{2}}. \quad (13)$$

So we obtain the Fourier transform as

$$\tilde{\phi}(a, \omega) = \pi^{0.25} \sqrt{2a} e^{\frac{-(a\omega - \omega_0)^2}{2}}. \quad (14)$$

In practice, we want to calculate a convolution of the wavelet and the time series:

$$W(a, t) = \int_{\tau=-\infty}^{\infty} d\tau x(\tau) \phi(a, t - \tau). \quad (15)$$

Since this is a convolution, we can write it as a product in Fourier space:

$$W(a, t) = \int_{\omega=-\infty}^{\infty} \frac{d\omega}{2\pi} e^{-i\omega t} \tilde{x}(\omega) \tilde{\phi}(a, \omega). \quad (16)$$

In practice, we do the wavelet transform in the following way: We start from a time series  $x_1, \dots, x_N$  which is the function  $x(t)$  sampled with an equidistant time step  $\Delta t$ . It is padded with zeros (between  $N/\sqrt{2}$  and  $N\sqrt{2}$  such that the resulting length is a power of 2). Then  $\tilde{x}_k$  is the fast Fourier transform of this padded time series.

Next we define a set of temporal scales  $a$ . For each of these  $a$ , we calculate the product in Fourier space as

$$\tilde{W}(a, \omega) = \tilde{x}(\omega) \pi^{0.25} \sqrt{2a} e^{\frac{-(a\omega - \omega_0)^2}{2}}. \quad (17)$$

Back-transformation then gives the wavelet amplitude  $W(a, t)$ .

Let's take a look at the units which we get. Assume for simplicity that  $x$  has the unit m. Time is measured in seconds, so  $a$  has the unit s and  $\omega$  has the unit  $\text{s}^{-1}$ . The relative scale  $\omega_0$  is dimensionless.

Equation (3) states that  $\phi(a, t)$  has the unit  $\text{s}^{-0.5}$ . So from equation (15) we can derive a unit for  $W(a, t)$  which is  $\text{m s}^{0.5}$  (note that  $dt$  has a unit of s). This is very impractical since this unit has no direct physical meaning.

Let's consider alternative normalisations. For example, let  $x(t)$  be a harmonic oscillation with a period matching that of the Wavelet and an amplitude of 1 m:

$$x(t) = (1 \text{ m}) \exp\left(-i \frac{\omega_0}{a} t\right). \quad (18)$$

We may want the wavelet to have an amplitude of  $x_0 = 1$  m as well. In this case, we obtain:

$$\begin{aligned}
x_0 = |W(a, t)| &= \left| \int_{\tau=-\infty}^{\infty} d\tau x(\tau) \phi(a, t - \tau) \right| & (19) \\
&= \left| \int_{\tau=-\infty}^{\infty} d\tau x_0 \exp\left(-i\frac{\omega_0}{a}\tau\right) b \exp\left(-i\omega_0\frac{t-\tau}{a}\right) \exp\left(-\frac{(t-\tau)^2}{2a^2}\right) \right| \\
&= \left| x_0 b \exp\left(-i\omega_0\frac{t}{a}\right) \right| \left| \int_{\tau=-\infty}^{\infty} d\tau \exp\left(-\frac{(t-\tau)^2}{2a^2}\right) \right| \\
&= |x_0 b| \left| a\sqrt{2\pi} \right| \\
b &= a^{-1}(2\pi)^{-0.5} & (20)
\end{aligned}$$

However, in reality, we only have the real part of the signal. Since both the real and the imaginary part will contribute the same to the amplitude, we need to multiply by a factor of two. Yes, it is a factor of two and not of  $\sqrt{2}$  because we never square the signal  $x(t)$  so  $W(a, t)$  depends linearly on  $x(t)$ . We end up with

$$b = a^{-1}\pi^{-0.5}\sqrt{2}. \quad (21)$$

This means the wavelet is defined as

$$\phi(a, t) = \frac{\sqrt{2}}{\sqrt{\pi a}} \exp\left(-i\omega_0\frac{t}{a}\right) \exp\left(-\frac{t^2}{2a^2}\right). \quad (22)$$

If we compare to the previous value of

$$b_{old} = \pi^{-0.25}a^{-0.5} \quad (23)$$

we find that we need to correct by a factor of  $\pi^{-0.25}a^{-0.5}\sqrt{2}$  and obtain

$$\tilde{W}(a, \omega) = \tilde{x}(\omega)2e^{\frac{-(a\omega-\omega_0)^2}{2}}. \quad (24)$$
